# Supplementary material for: PD‐1+ TIM‐3+ T cells in malignant ascites predict prognosis of gastrointestinal cancer
Source: PubMed Central journal article supplement — Cancer Sci. 2018 Sep 5;109(9):2986–92. doi: 10.1111/cas.13723 (PMC6125472; doi:10.1111/cas.13723), 2018-09-05
Supplement: CAS-109-2986-s001.pdf [file CAS-109-2986-s001.pdf]

# Figure S1

Distinct characteristics of CD4+ and CD8+ ascites TILs regarding Th1/2, Tfh, and the other types of lymphocytes.

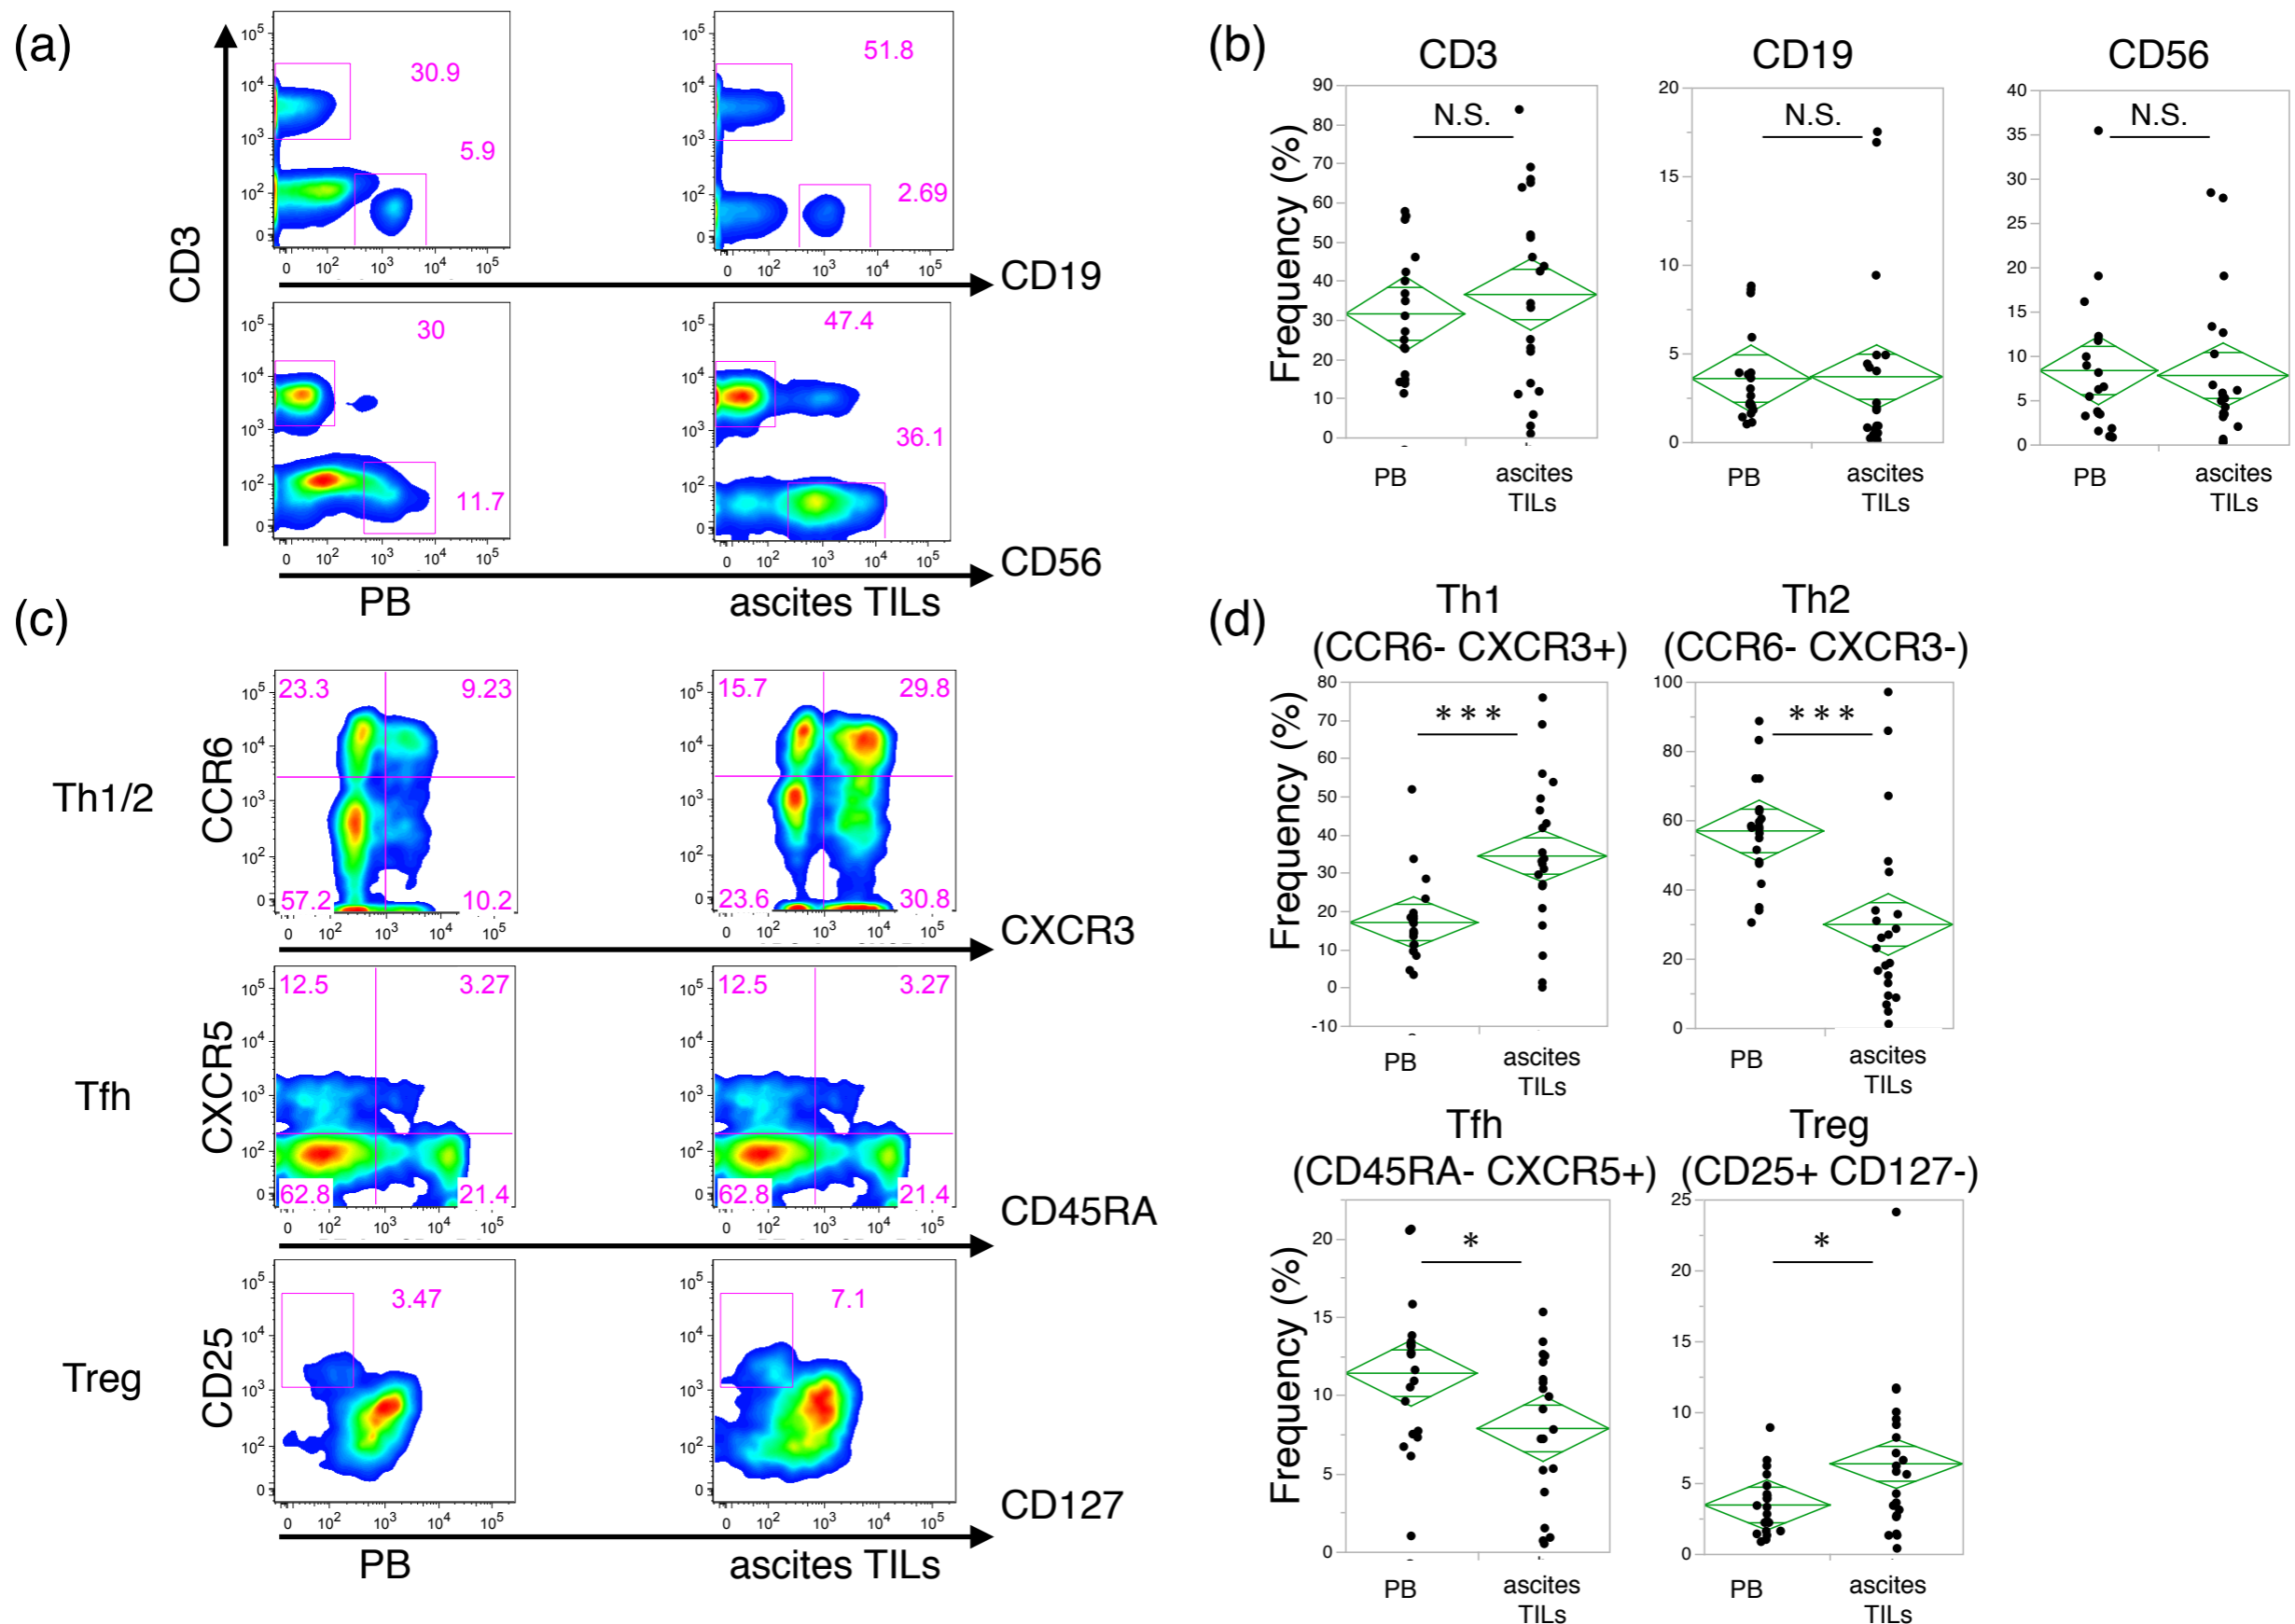

(a,c) Representative FACS plots of ascites TILs and paired-PB T cells showing the proportion of CD3/CD19/CD56, Th1/2, Tfh, and Treg (case 62). (b, d) Summarized dot plots of the frequency of CD3/CD19/CD56, Th1/2, Tfh, and Treg among ascites TILs and paired-PB T cells (n=22). Median values and 95% confidence interval (CI) are shown with diamond (\*p< 0.01; \*\*\*p < 0.001; N.S, no significance).
