# Supplementary material for: PD‐1+ TIM‐3+ T cells in malignant ascites predict prognosis of gastrointestinal cancer
Source: PubMed Central journal article supplement — Cancer Sci. 2018 Sep 5;109(9):2986–92. doi: 10.1111/cas.13723 (PMC6125472; doi:10.1111/cas.13723), 2018-09-05
Supplement: CAS-109-2986-s002.pdf [file CAS-109-2986-s002.pdf]

# Figure S2

Distinct characteristics of CD4+ and CD8+ ascites TILs in regard to memory, naive, and effector T cell subsets.

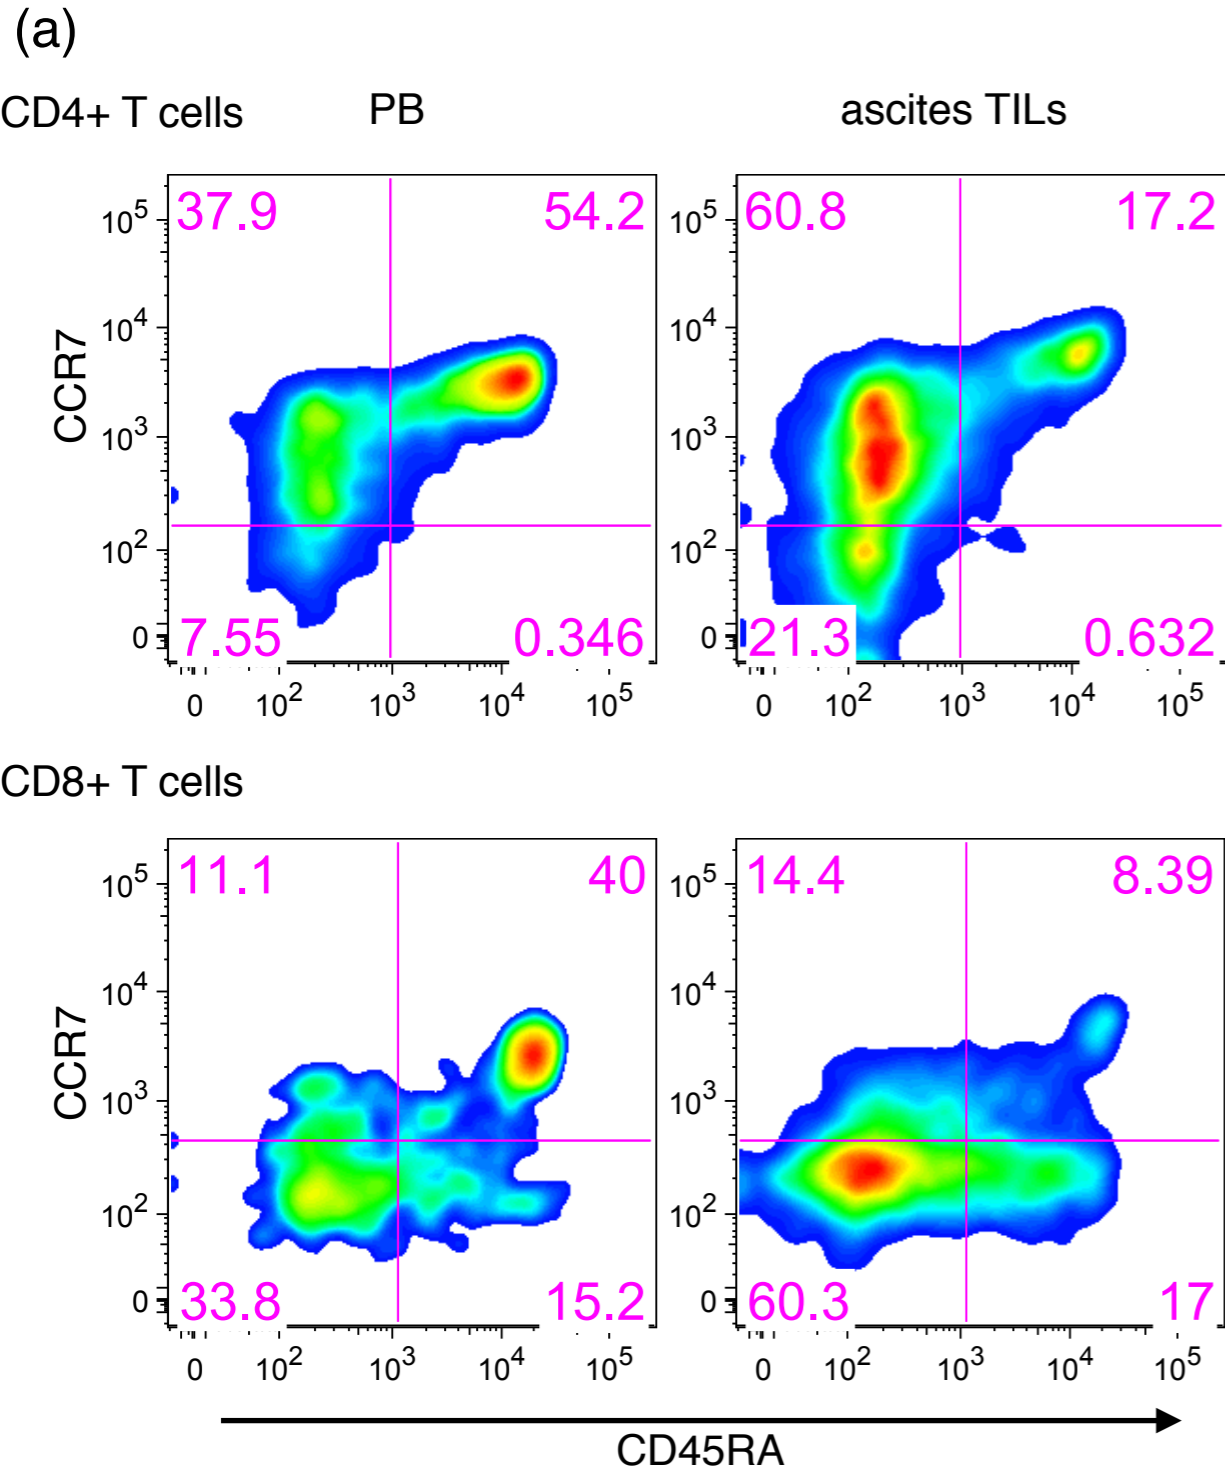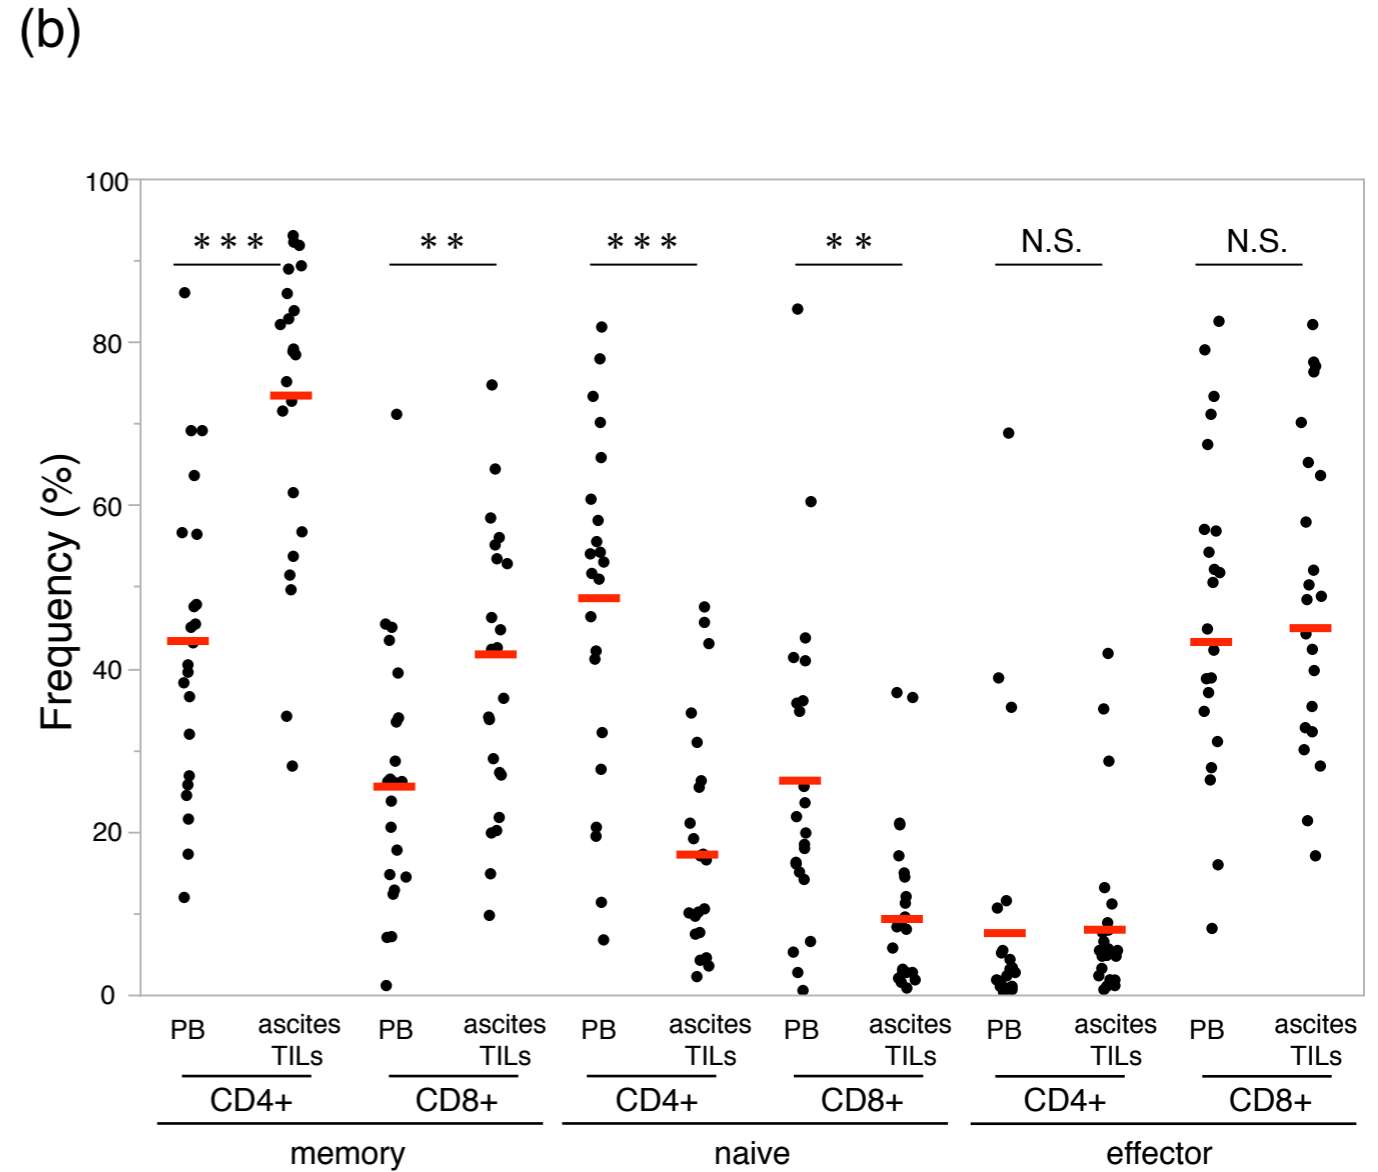

(a) Representative FACS plots of ascites TILs and paired-PB T cells showing the proportion of memory/naive/effector T cells among the CD4+ and CD8+ population (case 62).

(b) Summarized dot plots of the frequency of memory/naive/effector T cells among ascites TILs and paired-PB T cells (n=22). Median values are shown with red lines (\*\*p < 0.01; \*\*\*p < 0.001; N.S, no significance).
