# Supplementary material for: PD‐1+ TIM‐3+ T cells in malignant ascites predict prognosis of gastrointestinal cancer
Source: PubMed Central journal article supplement — Cancer Sci. 2018 Sep 5;109(9):2986–92. doi: 10.1111/cas.13723 (PMC6125472; doi:10.1111/cas.13723), 2018-09-05
Supplement: CAS-109-2986-s003.pdf [file CAS-109-2986-s003.pdf]

# Figure S3

Frequencies of memory/naïve/effector phenotype ascites TILs within exhaustion marker positive cells in CD4+ and CD8+ cells.

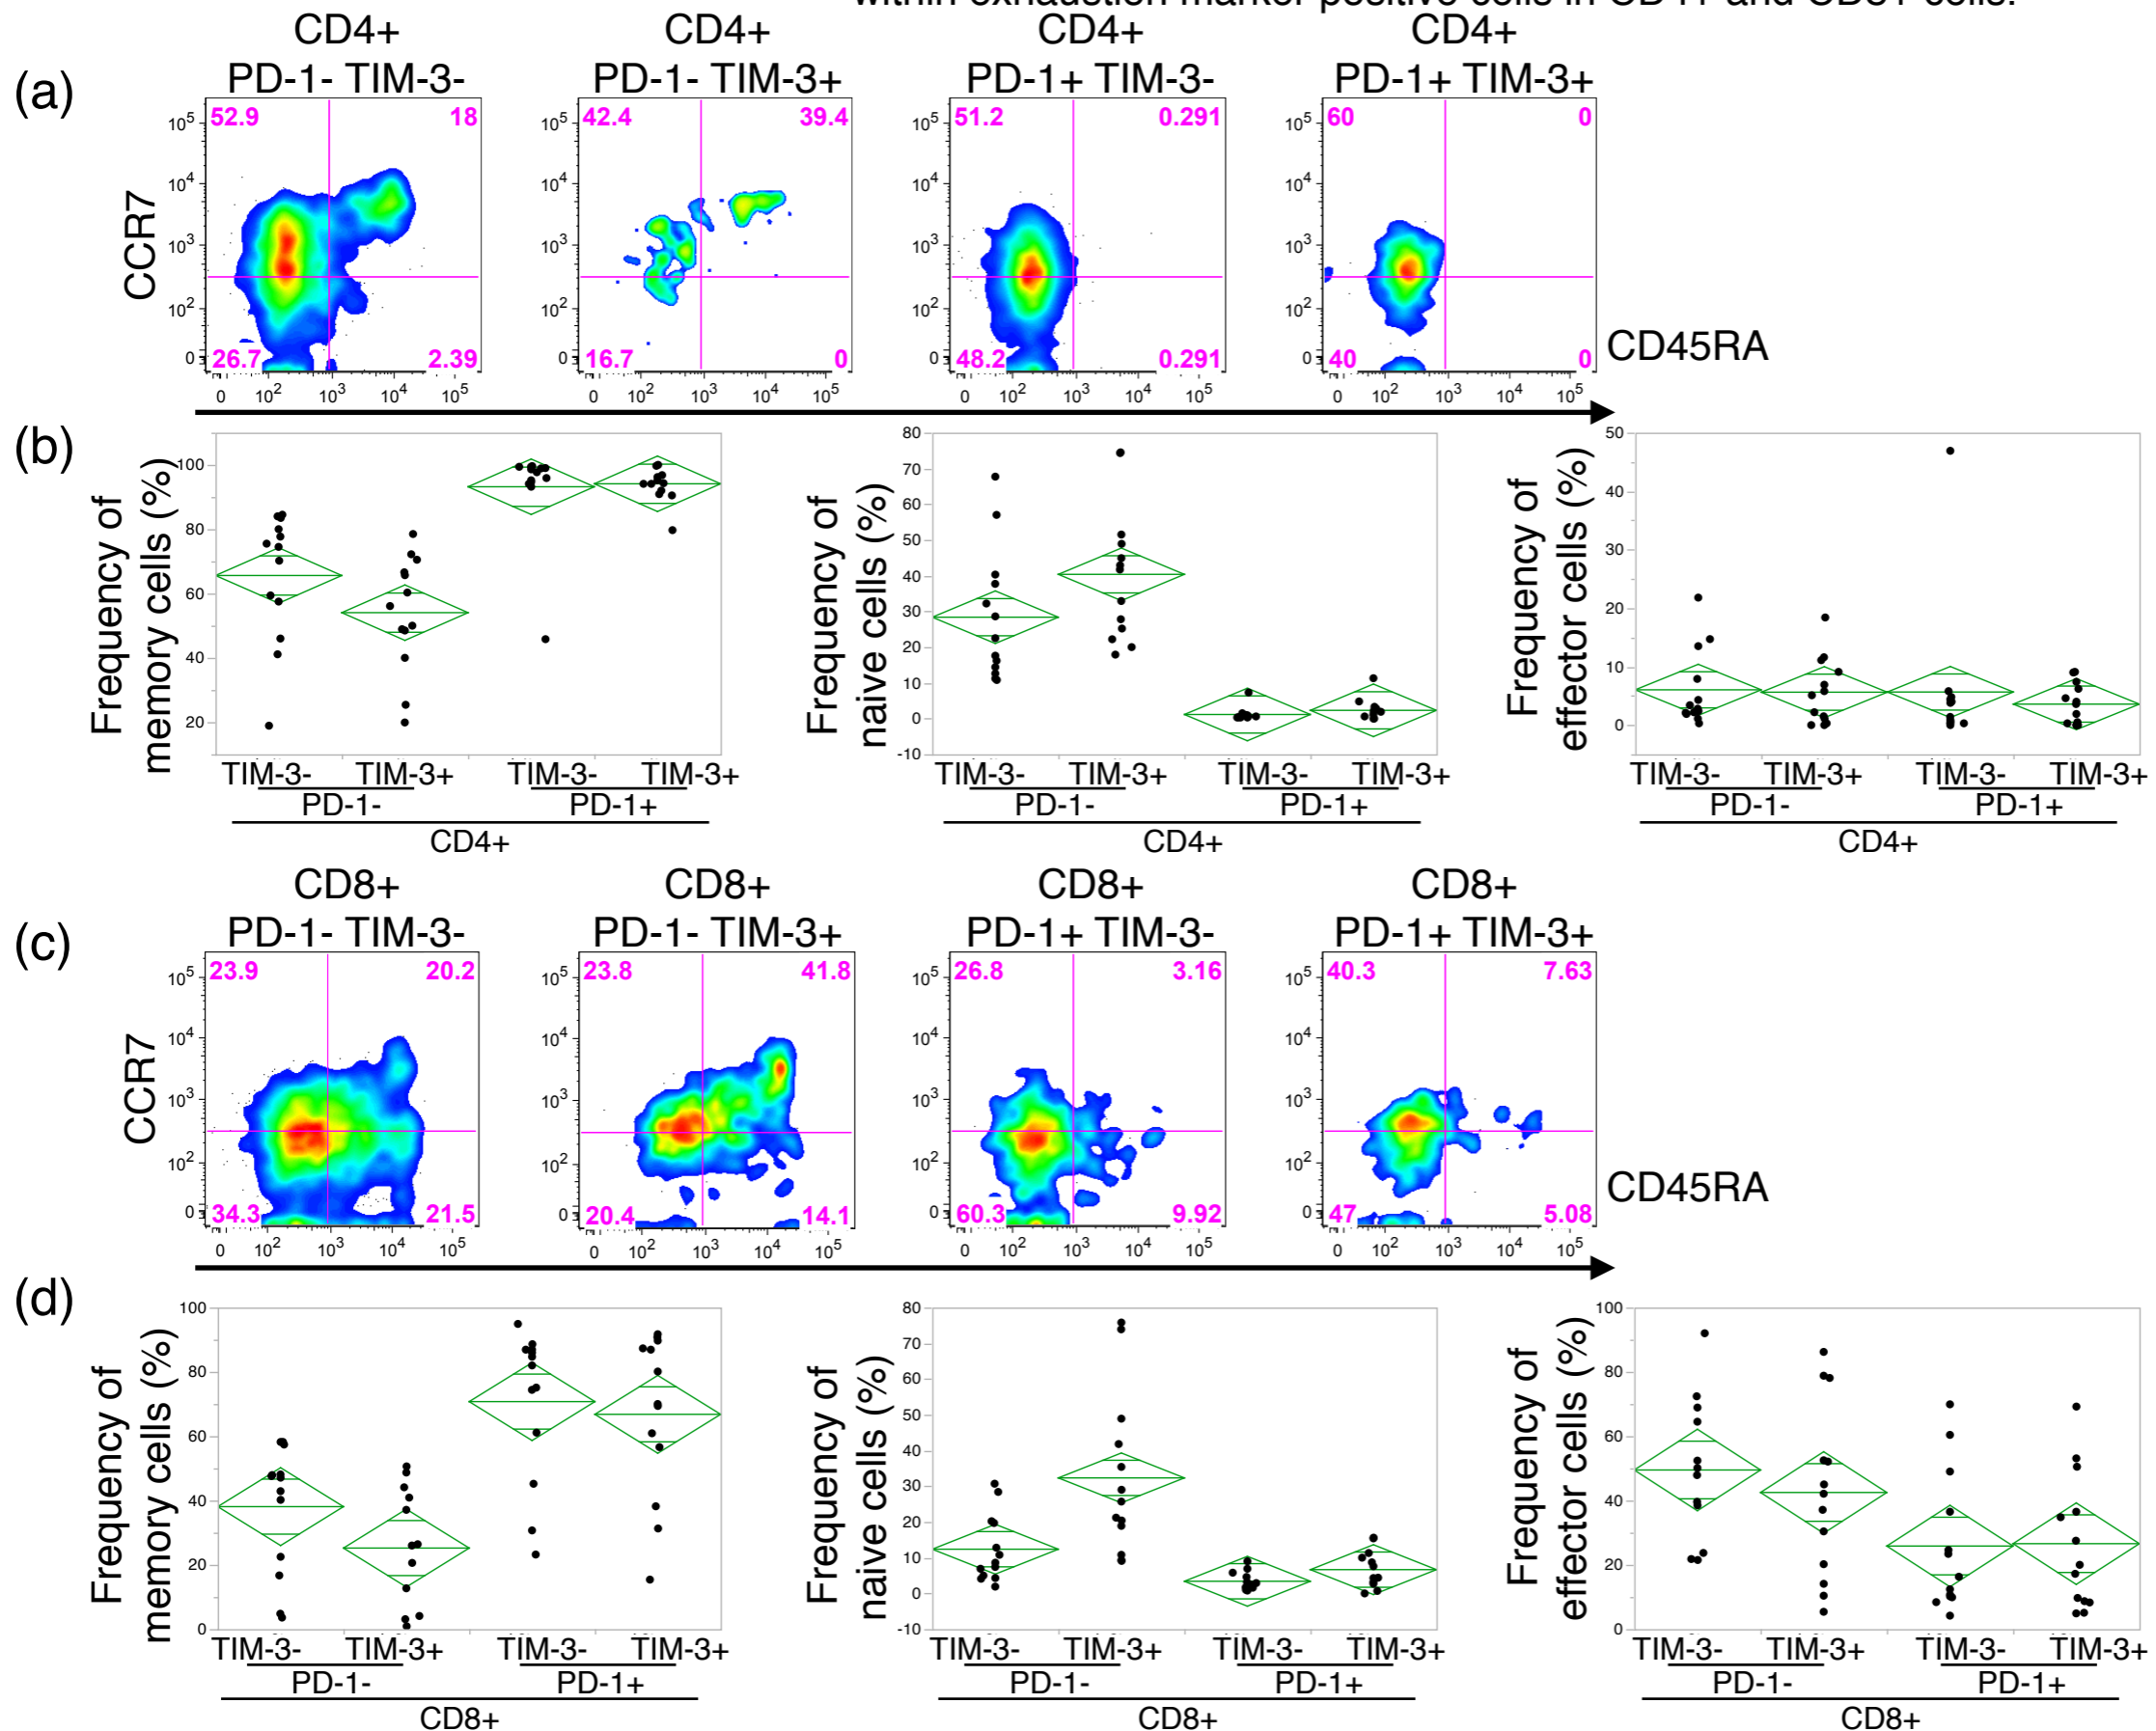

(a, c) Representative FACS plots regarding memory/naïve/effector phenotype of PD-1- TIM-3- / PD-1- TIM-3+ / PD-1+ TIM-3- / PD-1+ TIM-3+ in ascites TILs within CD4+ and CD8+ cells (case 62). (b, d) Summarized dot plots of the frequencies of memory/naïve/effector ascites TILs in each fraction (PD-1- TIM-3- / PD-1- TIM-3+ / PD-1+ TIM-3- / PD-1+ TIM-3+) among CD4+ and CD8+ cells (n=13). Median values and 95% CI are shown with diamond.
