# Supplementary material for: PD‐1+ TIM‐3+ T cells in malignant ascites predict prognosis of gastrointestinal cancer
Source: PubMed Central journal article supplement — Cancer Sci. 2018 Sep 5;109(9):2986–92. doi: 10.1111/cas.13723 (PMC6125472; doi:10.1111/cas.13723), 2018-09-05
Supplement: CAS-109-2986-s005.pdf [file CAS-109-2986-s005.pdf]

# Figure S5

Prognosis according to TIM-3+ TILs among the CD4+ and CD8+ cell populations in gastrointestinal malignancies.

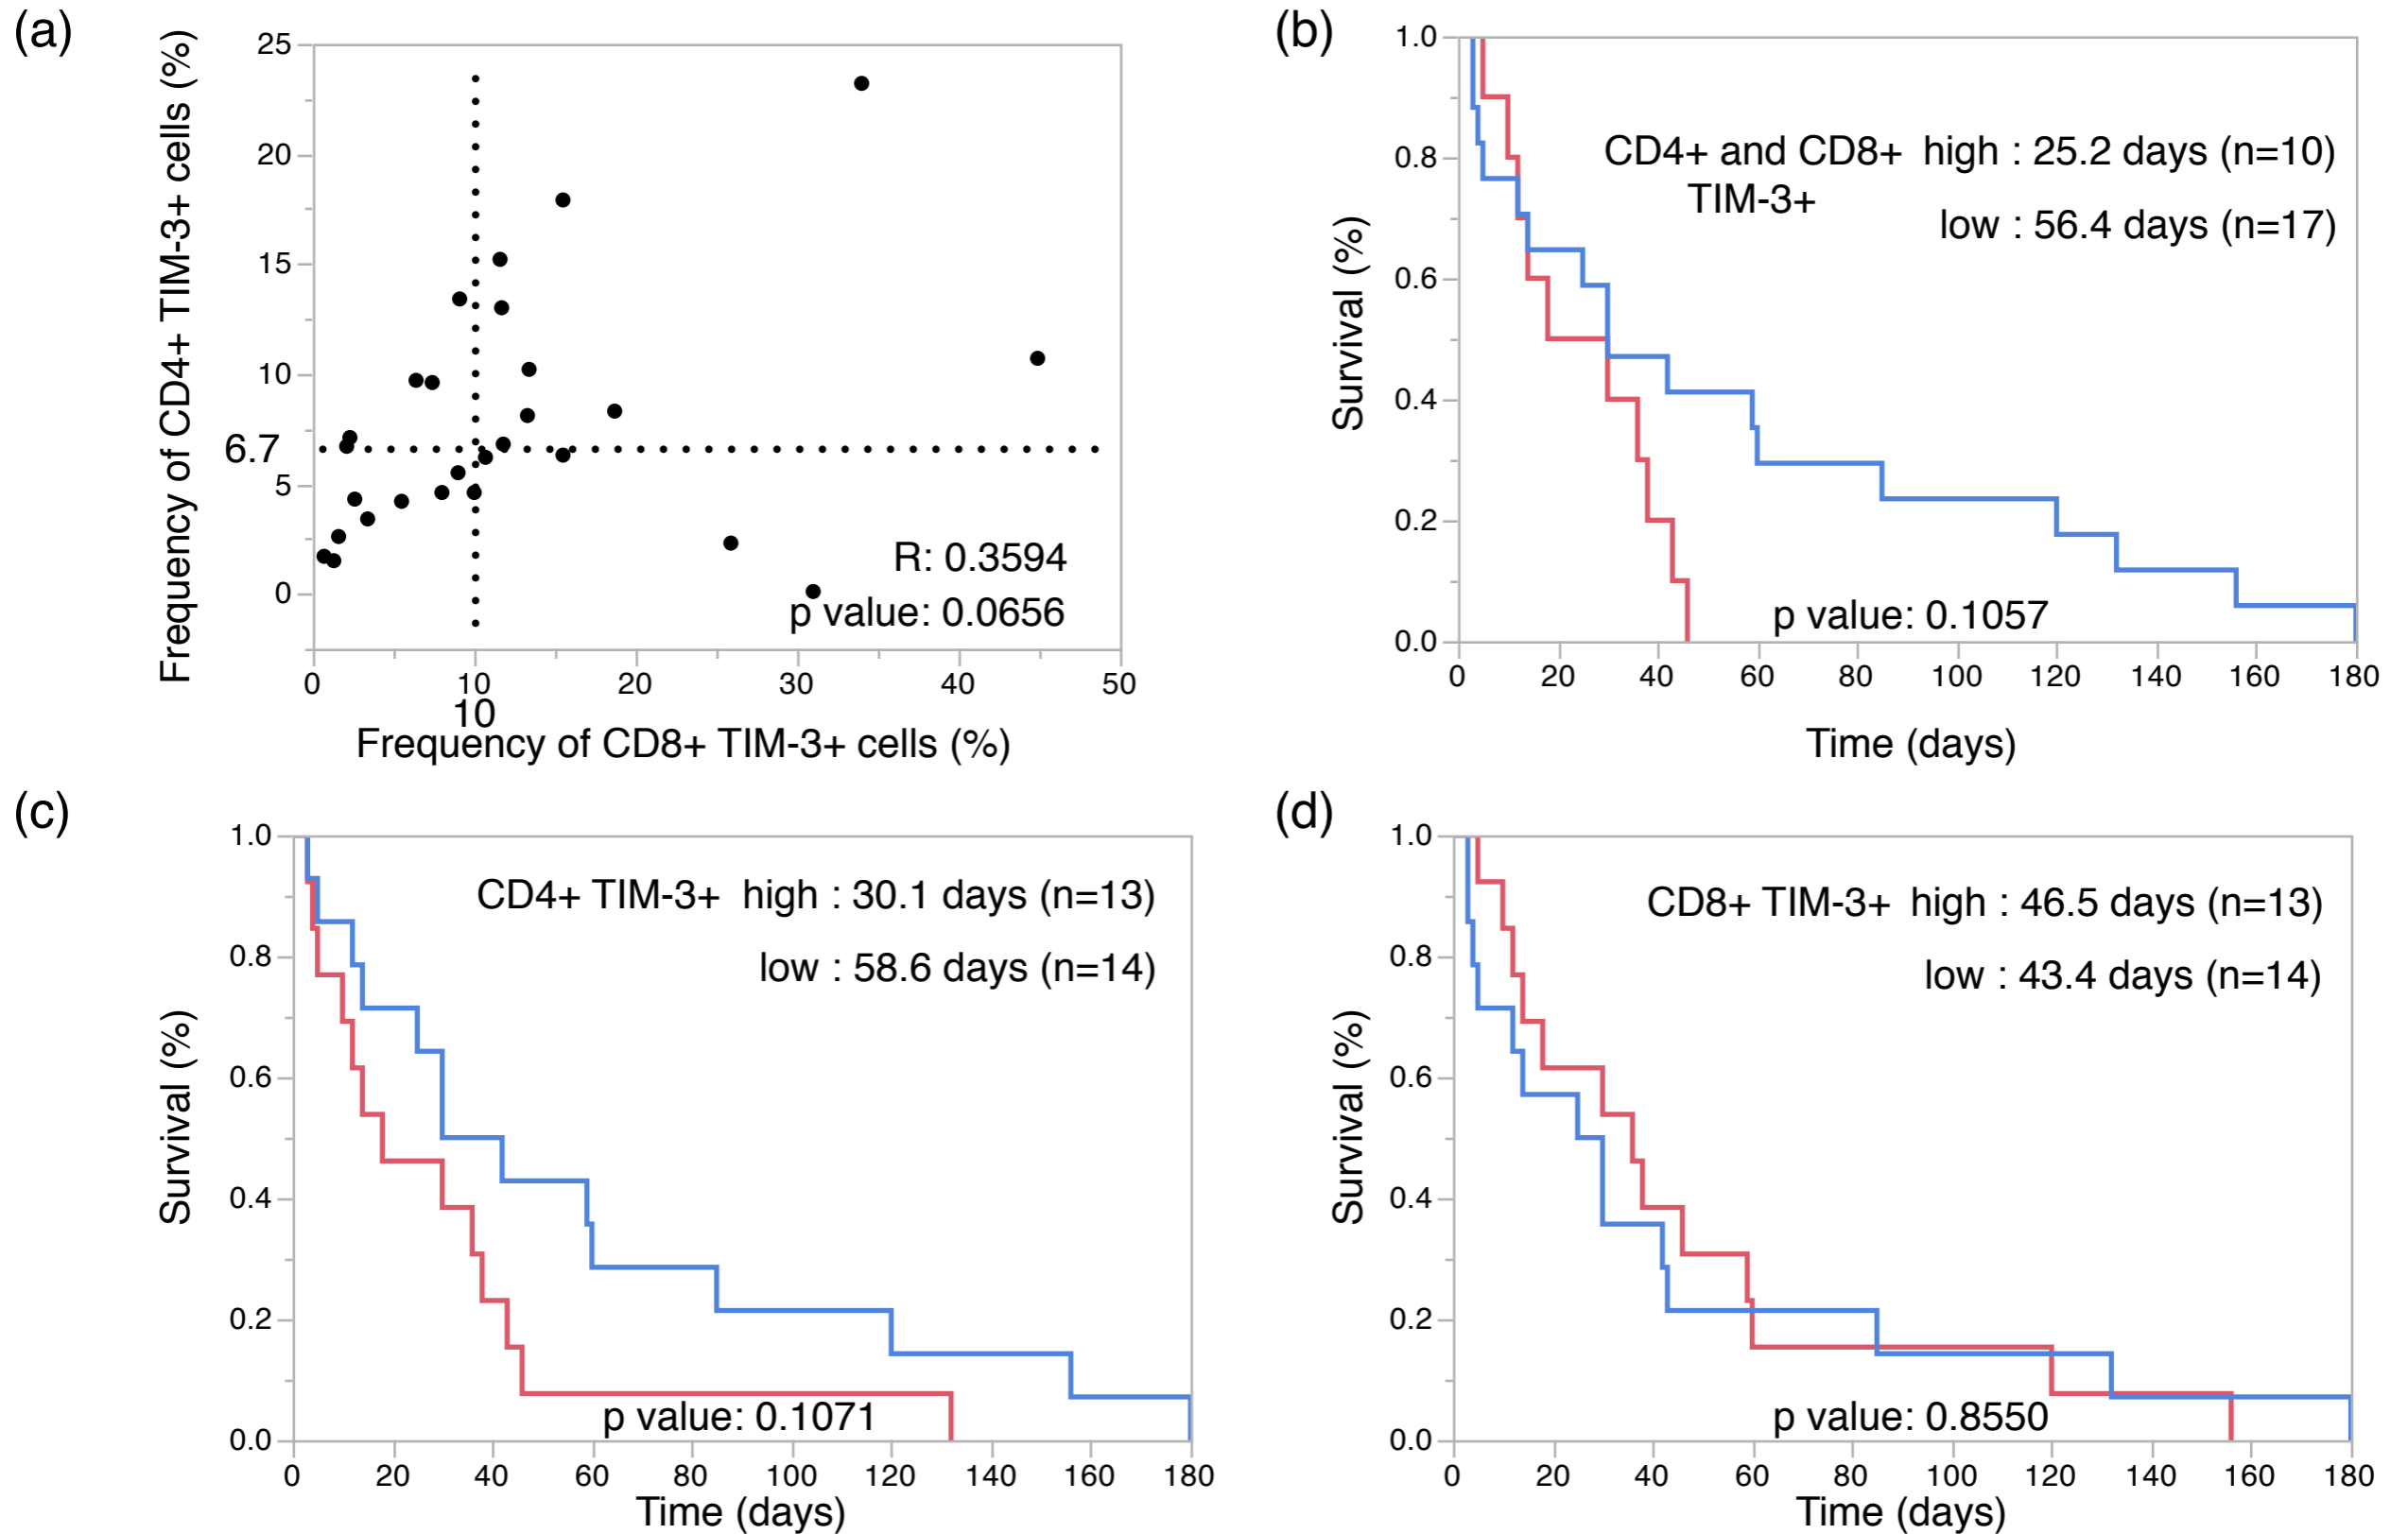

(a) Dot plot of the frequency of TIM-3+ ascites TILs among CD4+ and CD8+ T cells. The cut-off value was defined by the median of the 27 cases (median CD4+, 6.7%; median CD8+, 10.0%).

(b, c, d) Kaplan-Meier curves for overall survival of the indicated patient groups, as classified by the frequency of TIM-3+ cells among CD4+ and CD8+, CD4+, CD8+ ascites TILs. Median overall survival (days) of each patient group was shown in a frame.
